# Supplementary material for: Analysis-ready datasets for insecticide resistance phenotype and genotype frequency in African malaria vectors
Source: Springer Nature journal article supplement (doi:10.1038/s41597-019-0134-2), 2019-07-15
Supplement: 41597_2019_134_MOESM2_ESM.pdf [file 41597_2019_134_MOESM2_ESM.pdf]

## **Supplementary Information**

|                                        |        |
|----------------------------------------|--------|
| Inclusion criteria                     | 2 - 3  |
| Recommended doses and exposure periods | 4 - 8  |
| Species identification methods         | 9 - 29 |

### **Inclusion criteria for data on the prevalence of the insecticide resistance phenotype**

1. Was a WHO susceptibility test used?
  - a. If yes, was 100% mortality in the susceptible strain achieved after exposure to the treated paper?
    - i. If yes, see question 2.
    - ii. If no, exclude.
  - b. If no, was a CDC bottle bioassay used?
    - i. If yes, see question 2.
    - ii. If no, exclude.
2. Were F0 or F1 generation mosquitoes derived from a field collection used?
  - a. If yes, see question 3.
  - b. If no, exclude.
3. Are the results disaggregated to species?
  - a. If no, include in the dataset for the relevant complex/subgroup only.
  - b. If yes, can the species results be combined to provide an unbiased result for the original complex/subgroup sample?
    - i. If yes, include each species result in the species dataset and include the combined result in the complex/subgroup dataset.
    - ii. If no, include each species result in the species dataset only.

### **Inclusion criteria for data on *Vgsc* allele frequencies**

1. Were *Vgsc* alleles tested for?
  - a. If yes, see question 2.
  - b. If no, exclude.
2. Were F0 or F1 generation mosquitoes derived from a field collection used?
  - a. If yes, see question 3.
  - b. If no, exclude.
3. Are the results disaggregated to species and/or to dead/alive mosquitoes?
  - a. If no, include in the dataset for the relevant complex/subgroup only.
  - b. If disaggregated to species only, can the species results be combined to provide an unbiased result for the original complex/subgroup sample?
    - i. If yes, include each species result in the species dataset and include the combined result in the complex/subgroup dataset.
    - ii. If no, include each species result in the species dataset only.
  - c. If disaggregated to dead/alive mosquitoes only, can the dead/alive results be combined to provide an unbiased result for the original complex/subgroup sample?
    - i. If yes, include in the dataset for the relevant complex/subgroup.
    - ii. If no, exclude.
  - d. If disaggregated to both species and to dead/alive, can the dead/alive results for a species be combined to provide an unbiased result for that species?
    - i. If no, exclude.

- ii. If yes, can the species results then be combined to provide an unbiased result for the original complex/subgroup sample?
  - I. If yes, include each species result in the species dataset and include the combined result in the complex/subgroup dataset.
  - II. If no, include each species result in the species dataset only.

| Protocol | DDT           |                 | Dieldrin      |                 |
|----------|---------------|-----------------|---------------|-----------------|
|          | Concentration | Duration (min.) | Concentration | Duration (min.) |
| WHO 1963 | multiple      | 60              | multiple      | 60              |
| WHO 1970 | multiple      | 60              | multiple      | 60              |
| WHO 1975 | multiple      | 60              | multiple      | 60              |
| WHO 1976 | multiple      | 60              | multiple      | 60              |
| WHO 1980 | 4%            | 60              | 4%            | 60              |
| WHO 1981 | 4%            | 60              | 4%            | 60              |
| WHO 1982 | 4%            | 60              | 4%            | 60              |
| WHO 1986 | 4%            | 60              | 4%            | 60              |
| WHO 1988 | 4%            | 60              | 4%            | 60              |
| WHO 1992 | 4%            | 60              | 4%            | 60              |
| WHO 1998 | 4%            | 60              | 4%            | 60              |
| WHO 2013 | 4%            | 60              | 0.4%, 4%      | 60              |
| WHO 2016 | 4%            | 60              | 4%            | 60              |
| CDC      | 100 µg/bottle | 45              |               |                 |

| Protocol | Fenthion      |                 | Propoxur      |                 |
|----------|---------------|-----------------|---------------|-----------------|
|          | Concentration | Duration (min.) | Concentration | Duration (min.) |
| WHO 1963 |               |                 |               | 60              |
| WHO 1970 | 0.25%, 2.5%   | 60              | 0.01%, 0.1%   | 60              |
| WHO 1975 | 0.25%, 2.5%   | 60              | 0.01%, 0.1%   | 60              |
| WHO 1976 | 0.25%, 2.5%   | 60              | 0.01%, 0.1%   | 60              |
| WHO 1980 |               |                 | 0.1%          | 60              |
| WHO 1981 |               |                 | 0.1%          | 60              |
| WHO 1982 |               |                 | 0.1%          | 60              |
| WHO 1986 | 2.5%          | 60              | 0.1%          | 60              |
| WHO 1988 |               |                 | 0.1%          | 60              |
| WHO 1992 |               |                 | 0.1%          | 60              |
| WHO 1998 |               |                 | 0.1%          | 60              |
| WHO 2013 |               |                 | 0.1%          | 60              |
| WHO 2016 |               |                 | 0.1%          | 60              |
| CDC      |               |                 |               |                 |

| Protocol | Malathion     |                 | Fenitrothion  |                 |
|----------|---------------|-----------------|---------------|-----------------|
|          | Concentration | Duration (min.) | Concentration | Duration (min.) |
| WHO 1963 | 0.5%, 5%      | 60              | 0.1%, 1%      | 60              |
| WHO 1970 | 0.5%, 5%      | 60              | 0.1%, 1%      | 60              |
| WHO 1975 | 0.5%, 5%      | 60              | 0.1%, 1%      | 60              |
| WHO 1976 | 0.5%, 5%      | 60              | 0.1%, 1%      | 60              |
| WHO 1980 | 5%            | 60              | 1%            | 120             |
| WHO 1981 | 5%            | 60              | 1%            | 120             |
| WHO 1982 | 5%            | 60              | 1%            | 120             |
| WHO 1986 | 5%            | 60              | 1%            | 120             |
| WHO 1988 | 5%            | 60              | 1%            | 120             |
| WHO 1992 | 5%            | 60              | 1%            | 120             |
| WHO 1998 | 5%            | 60              | 1%            | 120             |
| WHO 2013 | 5%            | 60              | 1%            | 120             |
| WHO 2016 | 5%            | 60              | 1%            | 120             |
| CDC      | 50 µg/bottle  | 30              | 50 µg/bottle  | 30              |

| Protocol | Chlorphoxim   |                 | Permethrin     |                 |
|----------|---------------|-----------------|----------------|-----------------|
|          | Concentration | Duration (min.) | Concentration  | Duration (min.) |
| WHO 1963 |               |                 |                |                 |
| WHO 1970 |               |                 |                |                 |
| WHO 1975 |               |                 |                |                 |
| WHO 1976 |               |                 |                |                 |
| WHO 1980 | 4%            | 60              | 0.25%          | 60              |
| WHO 1981 | 4%            | 60              | 0.25%          | 60              |
| WHO 1982 |               |                 | 0.25%          | 60              |
| WHO 1986 |               |                 | 0.25%          | 60              |
| WHO 1988 |               |                 | 0.25%          | 60              |
| WHO 1992 |               |                 | 0.25%          | 60              |
| WHO 1998 |               |                 | 0.75%          | 60              |
| WHO 2013 |               |                 | 0.75%          | 60              |
| WHO 2016 |               |                 | 0.75%          | 60              |
| CDC      |               |                 | 21.5 µg/bottle | 30              |

| Protocol | Deltamethrin   |                 | Lambda-cyhalothrin |                 |
|----------|----------------|-----------------|--------------------|-----------------|
|          | Concentration  | Duration (min.) | Concentration      | Duration (min.) |
| WHO 1963 |                |                 |                    |                 |
| WHO 1970 |                |                 |                    |                 |
| WHO 1975 |                |                 |                    |                 |
| WHO 1976 |                |                 |                    |                 |
| WHO 1980 | 0.025%         | 60              |                    |                 |
| WHO 1981 | 0.025%         | 60              |                    |                 |
| WHO 1982 | 0.025%         | 60              |                    |                 |
| WHO 1986 | 0.025%         | 60              |                    |                 |
| WHO 1988 | 0.025%         | 60              |                    |                 |
| WHO 1992 | 0.025%         | 60              | 0.1%               | 60              |
| WHO 1998 | 0.5%           | 60              | 0.05%              | 60              |
| WHO 2013 | 0.5%           | 60              | 0.05%              | 60              |
| WHO 2016 | 0.5%           | 60              | 0.05%              | 60              |
| CDC      | 12.5 µg/bottle | 30              | 12.5 µg/bottle     | 30              |

| Protocol | Pirimiphos-methyl |                 | Carbosulfan   |                 |
|----------|-------------------|-----------------|---------------|-----------------|
|          | Concentration     | Duration (min.) | Concentration | Duration (min.) |
| WHO 1963 |                   |                 |               |                 |
| WHO 1970 |                   |                 |               |                 |
| WHO 1975 |                   |                 |               |                 |
| WHO 1976 |                   |                 |               |                 |
| WHO 1980 |                   |                 |               |                 |
| WHO 1981 |                   |                 |               |                 |
| WHO 1982 |                   |                 |               |                 |
| WHO 1986 |                   |                 |               |                 |
| WHO 1988 |                   |                 |               |                 |
| WHO 1992 |                   |                 |               |                 |
| WHO 1998 |                   |                 |               |                 |
| WHO 2013 | 0.25%             | 60              | 0.40%         | 60              |
| WHO 2016 | 0.25%             | 60              | 0.40%         | 60              |
| CDC      | 20 µg/bottle      | 30              |               |                 |

| Protocol | Bendiocarb     |                 | Etofenprox    |                 |
|----------|----------------|-----------------|---------------|-----------------|
|          | Concentration  | Duration (min.) | Concentration | Duration (min.) |
| WHO 1963 |                |                 |               |                 |
| WHO 1970 |                |                 |               |                 |
| WHO 1975 |                |                 |               |                 |
| WHO 1976 |                |                 |               |                 |
| WHO 1980 |                |                 |               |                 |
| WHO 1981 | 0.1%           | 60              |               |                 |
| WHO 1982 |                |                 |               |                 |
| WHO 1986 |                |                 |               |                 |
| WHO 1988 |                |                 |               |                 |
| WHO 1992 |                |                 | 0.25%         | 60              |
| WHO 1998 | 0.1%           | 60              | 0.5%          | 60              |
| WHO 2013 | 0.1%           | 60              | 0.5%          | 60              |
| WHO 2016 | 0.1%           | 60              | 0.5%          | 60              |
| CDC      | 12.5 µg/bottle | 30              |               |                 |

| Protocol | Cyfluthrin     |                 | Chlorfenapyr  |                 |
|----------|----------------|-----------------|---------------|-----------------|
|          | Concentration  | Duration (min.) | Concentration | Duration (min.) |
| WHO 1963 |                |                 |               |                 |
| WHO 1970 |                |                 |               |                 |
| WHO 1975 |                |                 |               |                 |
| WHO 1976 |                |                 |               |                 |
| WHO 1980 |                |                 |               |                 |
| WHO 1981 |                |                 |               |                 |
| WHO 1982 |                |                 |               |                 |
| WHO 1986 |                |                 |               |                 |
| WHO 1988 |                |                 |               |                 |
| WHO 1992 |                |                 |               |                 |
| WHO 1998 |                |                 |               |                 |
| WHO 2013 | 0.15%          | 60              | 5%            | 60              |
| WHO 2016 | 0.15%          | 60              |               |                 |
| CDC      | 12.5 µg/bottle | 30              |               |                 |

| Protocol | Fipronil      |                 | Alpha-cypermethrin |                 |
|----------|---------------|-----------------|--------------------|-----------------|
|          | Concentration | Duration (min.) | Concentration      | Duration (min.) |
| WHO 1963 |               |                 |                    |                 |
| WHO 1970 |               |                 |                    |                 |
| WHO 1975 |               |                 |                    |                 |
| WHO 1976 |               |                 |                    |                 |
| WHO 1980 |               |                 |                    |                 |
| WHO 1981 |               |                 |                    |                 |
| WHO 1982 |               |                 |                    |                 |
| WHO 1986 |               |                 |                    |                 |
| WHO 1988 |               |                 |                    |                 |
| WHO 1992 |               |                 |                    |                 |
| WHO 1998 |               |                 |                    |                 |
| WHO 2013 | 2%            | 60              |                    |                 |
| WHO 2016 | 2%            | 60              | 0.05%              | 60              |
| CDC      |               |                 | 12.5 µg/bottle     | 30              |

| Protocol | Piperonyl butoxide |                 |
|----------|--------------------|-----------------|
|          | Concentration      | Duration (min.) |
| WHO 1963 |                    |                 |
| WHO 1970 |                    |                 |
| WHO 1975 |                    |                 |
| WHO 1976 |                    |                 |
| WHO 1980 |                    |                 |
| WHO 1981 |                    |                 |
| WHO 1982 |                    |                 |
| WHO 1986 |                    |                 |
| WHO 1988 |                    |                 |
| WHO 1992 |                    |                 |
| WHO 1998 |                    |                 |
| WHO 2013 |                    |                 |
| WHO 2016 | 4%                 | 60              |
| CDC      |                    |                 |

| Species                       | Complex | Subgroup  | Group    | Series       |
|-------------------------------|---------|-----------|----------|--------------|
| <i>An. amharicus</i>          | gambiae |           |          | pyretophorus |
| <i>An. arabiensis</i>         | gambiae |           |          | pyretophorus |
| <i>An. bwambae</i>            | gambiae |           |          | pyretophorus |
| <i>An. coluzzii</i>           | gambiae |           |          | pyretophorus |
| <i>An. gambiae s.s.</i>       | gambiae |           |          | pyretophorus |
| <i>An. coluzzii/gambiae</i>   | gambiae |           |          | pyretophorus |
| <i>An. melas</i>              | gambiae |           |          | pyretophorus |
| <i>An. merus</i>              | gambiae |           |          | pyretophorus |
| <i>An. quadriannulatus</i>    | gambiae |           |          | pyretophorus |
| <i>An. nili</i>               | nili    |           | ardensis | neomyzomyia  |
| <i>An. carnevalei</i>         | nili    |           | ardensis | neomyzomyia  |
| <i>An. ovengensis</i>         | nili    |           | ardensis | neomyzomyia  |
| <i>An. somalicus</i>          | nili    |           | ardensis | neomyzomyia  |
| <i>An. aruni</i>              |         | funestus  | funestus | myzomyia     |
| <i>An. confusus</i>           |         | funestus  | funestus | myzomyia     |
| <i>An. funestus</i>           |         | funestus  | funestus | myzomyia     |
| <i>An. funestus-like</i>      |         | funestus  | funestus | myzomyia     |
| <i>An. longipalpis type C</i> |         | funestus  | funestus | myzomyia     |
| <i>An. parensis</i>           |         | funestus  | funestus | myzomyia     |
| <i>An. vaneedeni</i>          |         | funestus  | funestus | myzomyia     |
| <i>An. brucei</i>             |         | rivulorum | funestus | myzomyia     |
| <i>An. fuscivenosus</i>       |         | rivulorum | funestus | myzomyia     |
| <i>An. rivulorum</i>          |         | rivulorum | funestus | myzomyia     |
| <i>An. rivulorum-like</i>     |         | rivulorum | funestus | myzomyia     |
| <i>An. lesoni</i>             |         | minimus   | funestus | myzomyia     |
| <i>An. moucheti</i>           |         |           |          | myzomyia     |
| <i>An. bervoetsi</i>          |         |           |          | myzomyia     |

| First Author                  | Scott         | Fanello            | Favia              | Favia         |
|-------------------------------|---------------|--------------------|--------------------|---------------|
| Year of publication           | 1993          | 2002               | 1997               | 2001          |
| Technique                     | PCR: rDNA IGS | PCR-RFLP: rDNA IGS | PCR-RFLP: rDNA IGS | PCR: rDNA IGS |
| Species                       |               |                    |                    |               |
| <i>An. amharicus</i>          |               |                    |                    |               |
| <i>An. arabiensis</i>         | 1             | 1                  |                    |               |
| <i>An. bwambae</i>            |               |                    |                    |               |
| <i>An. coluzzii</i>           |               |                    | 1                  | 1             |
| <i>An. gambiae s.s.</i>       |               |                    | 1                  | 1             |
| <i>An. coluzzii/gambiae</i>   | 1             |                    |                    |               |
| <i>An. melas</i>              | 1             | 1                  |                    |               |
| <i>An. merus</i>              | 1             | 1                  |                    |               |
| <i>An. quadriannulatus</i>    | 1             | 1                  |                    |               |
| <i>An. nili</i>               |               |                    |                    |               |
| <i>An. carnevalei</i>         |               |                    |                    |               |
| <i>An. ovengensis</i>         |               |                    |                    |               |
| <i>An. somalicus</i>          |               |                    |                    |               |
| <i>An. aruni</i>              |               |                    |                    |               |
| <i>An. confusus</i>           |               |                    |                    |               |
| <i>An. funestus</i>           |               |                    |                    |               |
| <i>An. funestus-like</i>      |               |                    |                    |               |
| <i>An. longipalpis type C</i> |               |                    |                    |               |
| <i>An. parensis</i>           |               |                    |                    |               |
| <i>An. vaneedeni</i>          |               |                    |                    |               |
| <i>An. brucei</i>             |               |                    |                    |               |
| <i>An. fuscivenosus</i>       |               |                    |                    |               |
| <i>An. rivulorum</i>          |               |                    |                    |               |
| <i>An. rivulorum-like</i>     |               |                    |                    |               |
| <i>An. lesoni</i>             |               |                    |                    |               |
| <i>An. moucheti</i>           |               |                    |                    |               |
| <i>An. bervoetsi</i>          |               |                    |                    |               |

| First Author                  | Santolamazza                       | Santolamazza       | Wilkins |
|-------------------------------|------------------------------------|--------------------|---------|
| Year of publication           | 2008                               | 2004               | 2006    |
| Technique                     | SINE-PCR: SINE200 retrotransposons | PCR-RFLP: rDNA IGS | IMP-PCR |
| Species                       |                                    |                    |         |
| <i>An. amharicus</i>          |                                    |                    |         |
| <i>An. arabiensis</i>         |                                    | 1                  | 1       |
| <i>An. bwambae</i>            |                                    |                    |         |
| <i>An. coluzzii</i>           | 1                                  | 1                  | 1       |
| <i>An. gambiae s.s.</i>       | 1                                  | 1                  | 1       |
| <i>An. coluzzii/gambiae</i>   |                                    |                    |         |
| <i>An. melas</i>              |                                    |                    |         |
| <i>An. merus</i>              |                                    |                    | 1       |
| <i>An. quadriannulatus</i>    |                                    |                    | 1       |
| <i>An. nili</i>               |                                    |                    |         |
| <i>An. carnevalei</i>         |                                    |                    |         |
| <i>An. ovengensis</i>         |                                    |                    |         |
| <i>An. somalicus</i>          |                                    |                    |         |
| <i>An. aruni</i>              |                                    |                    |         |
| <i>An. confusus</i>           |                                    |                    |         |
| <i>An. funestus</i>           |                                    |                    |         |
| <i>An. funestus-like</i>      |                                    |                    |         |
| <i>An. longipalpis type C</i> |                                    |                    |         |
| <i>An. parensis</i>           |                                    |                    |         |
| <i>An. vaneedeni</i>          |                                    |                    |         |
| <i>An. brucei</i>             |                                    |                    |         |
| <i>An. fuscivenosus</i>       |                                    |                    |         |
| <i>An. rivulorum</i>          |                                    |                    |         |
| <i>An. rivulorum-like</i>     |                                    |                    |         |
| <i>An. leesoni</i>            |                                    |                    |         |
| <i>An. moucheti</i>           |                                    |                    |         |
| <i>An. bervoetsi</i>          |                                    |                    |         |

| First Author                  | della Torres       | Fanello       | Fettene       | Fettene       |
|-------------------------------|--------------------|---------------|---------------|---------------|
| Year of publication           | 2001               | 2003          | 2003          | 2002          |
| Technique                     | PCR-RFLP: rDNA IGS | PCR: rDNA IGS | PCR: rDNA IGS | PCR: rDNA IGS |
| Species                       |                    |               |               |               |
| <i>An. amharicus</i>          |                    |               | 1             | 1             |
| <i>An. arabiensis</i>         |                    |               | 1             | 1             |
| <i>An. bwambae</i>            |                    |               |               |               |
| <i>An. coluzzii</i>           | 1                  | 1             |               |               |
| <i>An. gambiae s.s.</i>       | 1                  | 1             |               |               |
| <i>An. coluzzii/gambiae</i>   |                    |               | 1             | 1             |
| <i>An. melas</i>              |                    |               | 1             | 1             |
| <i>An. merus</i>              |                    |               | 1             | 1             |
| <i>An. quadriannulatus</i>    |                    |               | 1             | 1             |
| <i>An. nili</i>               |                    |               |               |               |
| <i>An. carnevalei</i>         |                    |               |               |               |
| <i>An. ovengensis</i>         |                    |               |               |               |
| <i>An. somalicus</i>          |                    |               |               |               |
| <i>An. aruni</i>              |                    |               |               |               |
| <i>An. confusus</i>           |                    |               |               |               |
| <i>An. funestus</i>           |                    |               |               |               |
| <i>An. funestus-like</i>      |                    |               |               |               |
| <i>An. longipalpis type C</i> |                    |               |               |               |
| <i>An. parensis</i>           |                    |               |               |               |
| <i>An. vaneedeni</i>          |                    |               |               |               |
| <i>An. brucei</i>             |                    |               |               |               |
| <i>An. fuscivenosus</i>       |                    |               |               |               |
| <i>An. rivulorum</i>          |                    |               |               |               |
| <i>An. rivulorum-like</i>     |                    |               |               |               |
| <i>An. lesoni</i>             |                    |               |               |               |
| <i>An. moucheti</i>           |                    |               |               |               |
| <i>An. bervoetsi</i>          |                    |               |               |               |

| First Author                  | Mahon                      | Bass  | Van Rensburg  |  |
|-------------------------------|----------------------------|-------|---------------|--|
| Year of publication           | 1976                       | 2008  | 1996          |  |
| Technique                     | Electrophoresis: allozymes | rtPCR | PCR: rDNA IGS |  |
| Species                       |                            |       |               |  |
| <i>An. amharicus</i>          |                            |       |               |  |
| <i>An. arabiensis</i>         | 1                          | 1     | 1             |  |
| <i>An. bwambae</i>            |                            |       |               |  |
| <i>An. coluzzii</i>           |                            |       |               |  |
| <i>An. gambiae s.s.</i>       |                            |       |               |  |
| <i>An. coluzzii/gambiae</i>   | 1                          | 1     | 1             |  |
| <i>An. melas</i>              |                            |       | 1             |  |
| <i>An. merus</i>              | 1                          |       | 1             |  |
| <i>An. quadriannulatus</i>    | 1                          |       | 1             |  |
| <i>An. nili</i>               |                            |       |               |  |
| <i>An. carnevalei</i>         |                            |       |               |  |
| <i>An. ovengensis</i>         |                            |       |               |  |
| <i>An. somalicus</i>          |                            |       |               |  |
| <i>An. aruni</i>              |                            |       |               |  |
| <i>An. confusus</i>           |                            |       |               |  |
| <i>An. funestus</i>           |                            |       |               |  |
| <i>An. funestus-like</i>      |                            |       |               |  |
| <i>An. longipalpis type C</i> |                            |       |               |  |
| <i>An. parensis</i>           |                            |       |               |  |
| <i>An. vaneedeni</i>          |                            |       |               |  |
| <i>An. brucei</i>             |                            |       |               |  |
| <i>An. fuscivenosus</i>       |                            |       |               |  |
| <i>An. rivulorum</i>          |                            |       |               |  |
| <i>An. rivulorum-like</i>     |                            |       |               |  |
| <i>An. leesoni</i>            |                            |       |               |  |
| <i>An. moucheti</i>           |                            |       |               |  |
| <i>An. bervoetsi</i>          |                            |       |               |  |

| First Author                  | Miles                      | Petrarca | Coluzzi                       |
|-------------------------------|----------------------------|----------|-------------------------------|
| Year of publication           | 1979                       | 1983     | 1967                          |
| Technique                     | Electrophoresis: allozymes |          | Cytogenetics: salivary glands |
| Species                       |                            |          |                               |
| <i>An. amharicus</i>          |                            |          |                               |
| <i>An. arabiensis</i>         |                            |          | 1                             |
| <i>An. bwambae</i>            | 1                          |          |                               |
| <i>An. coluzzii</i>           |                            |          |                               |
| <i>An. gambiae s.s.</i>       |                            |          |                               |
| <i>An. coluzzii/gambiae</i>   |                            |          | 1                             |
| <i>An. melas</i>              | 1                          |          | 1                             |
| <i>An. merus</i>              | 1                          |          |                               |
| <i>An. quadriannulatus</i>    | 1                          |          |                               |
| <i>An. nili</i>               |                            |          |                               |
| <i>An. carnevalei</i>         |                            |          |                               |
| <i>An. ovengensis</i>         |                            |          |                               |
| <i>An. somalicus</i>          |                            |          |                               |
| <i>An. aruni</i>              |                            |          |                               |
| <i>An. confusus</i>           |                            |          |                               |
| <i>An. funestus</i>           |                            |          |                               |
| <i>An. funestus-like</i>      |                            |          |                               |
| <i>An. longipalpis type C</i> |                            |          |                               |
| <i>An. parensis</i>           |                            |          |                               |
| <i>An. vaneedeni</i>          |                            |          |                               |
| <i>An. brucei</i>             |                            |          |                               |
| <i>An. fuscivenosus</i>       |                            |          |                               |
| <i>An. rivulorum</i>          |                            |          |                               |
| <i>An. rivulorum-like</i>     |                            |          |                               |
| <i>An. leesoni</i>            |                            |          |                               |
| <i>An. moucheti</i>           |                            |          |                               |
| <i>An. bervoetsi</i>          |                            |          |                               |

| First Author                  | Coluzzi                       | Coluzzi      | Collins         |
|-------------------------------|-------------------------------|--------------|-----------------|
| Year of publication           | 1968                          | 1969         | 1987            |
| Technique                     | Cytogenetics: salivary glands | Cytogenetics | RFLP: DNA probe |
| Species                       |                               |              |                 |
| <i>An. amharicus</i>          |                               |              |                 |
| <i>An. arabiensis</i>         | 1                             | 1            | 1               |
| <i>An. bwambae</i>            |                               |              |                 |
| <i>An. coluzzii</i>           |                               |              |                 |
| <i>An. gambiae s.s.</i>       |                               |              |                 |
| <i>An. coluzzii/gambiae</i>   | 1                             | 1            | 1               |
| <i>An. melas</i>              |                               | 1            | 1               |
| <i>An. merus</i>              |                               | 1            |                 |
| <i>An. quadriannulatus</i>    | 1                             | 1            |                 |
| <i>An. nili</i>               |                               |              |                 |
| <i>An. carnevalei</i>         |                               |              |                 |
| <i>An. ovengensis</i>         |                               |              |                 |
| <i>An. somalicus</i>          |                               |              |                 |
| <i>An. aruni</i>              |                               |              |                 |
| <i>An. confusus</i>           |                               |              |                 |
| <i>An. funestus</i>           |                               |              |                 |
| <i>An. funestus-like</i>      |                               |              |                 |
| <i>An. longipalpis type C</i> |                               |              |                 |
| <i>An. parensis</i>           |                               |              |                 |
| <i>An. vaneedeni</i>          |                               |              |                 |
| <i>An. brucei</i>             |                               |              |                 |
| <i>An. fuscivenosus</i>       |                               |              |                 |
| <i>An. rivulorum</i>          |                               |              |                 |
| <i>An. rivulorum-like</i>     |                               |              |                 |
| <i>An. leesoni</i>            |                               |              |                 |
| <i>An. moucheti</i>           |                               |              |                 |
| <i>An. bervoetsi</i>          |                               |              |                 |

| First Author                  | Paskewitz     | Gentile       | Van Rensburg  | Townson       | Charalambous  |
|-------------------------------|---------------|---------------|---------------|---------------|---------------|
| Year of publication           | 1990          | 2001          | 1996          | 1994          | 1999          |
| Technique                     | PCR: rDNA IGS | PCR: rDNA ITS | PCR: rDNA IGS | PCR: rDNA IGS | PCR: rDNA IGS |
| Species                       |               |               |               |               |               |
| <i>An. amharicus</i>          |               |               |               |               |               |
| <i>An. arabiensis</i>         | 1             |               | 1             |               |               |
| <i>An. bwambae</i>            |               |               |               | 1             | 1             |
| <i>An. coluzzii</i>           |               | 1             |               |               |               |
| <i>An. gambiae s.s.</i>       |               | 1             |               |               |               |
| <i>An. coluzzii/gambiae</i>   | 1             |               | 1             |               | 1             |
| <i>An. melas</i>              |               |               | 1             |               |               |
| <i>An. merus</i>              |               |               | 1             |               |               |
| <i>An. quadriannulatus</i>    |               |               | 1             |               |               |
| <i>An. nili</i>               |               |               |               |               |               |
| <i>An. carnevalei</i>         |               |               |               |               |               |
| <i>An. ovengensis</i>         |               |               |               |               |               |
| <i>An. somalicus</i>          |               |               |               |               |               |
| <i>An. aruni</i>              |               |               |               |               |               |
| <i>An. confusus</i>           |               |               |               |               |               |
| <i>An. funestus</i>           |               |               |               |               |               |
| <i>An. funestus-like</i>      |               |               |               |               |               |
| <i>An. longipalpis type C</i> |               |               |               |               |               |
| <i>An. parensis</i>           |               |               |               |               |               |
| <i>An. vaneedeni</i>          |               |               |               |               |               |
| <i>An. brucei</i>             |               |               |               |               |               |
| <i>An. fuscivenosus</i>       |               |               |               |               |               |
| <i>An. rivulorum</i>          |               |               |               |               |               |
| <i>An. rivulorum-like</i>     |               |               |               |               |               |
| <i>An. leesoni</i>            |               |               |               |               |               |
| <i>An. moucheti</i>           |               |               |               |               |               |
| <i>An. bervoetsi</i>          |               |               |               |               |               |

| First Author                  | Miles                      | Gale       | Gale       | Coluzzi      |
|-------------------------------|----------------------------|------------|------------|--------------|
| Year of publication           | 1978                       | 1987       | 1987       | 1978         |
| Technique                     | Electrophoresis: allozymes | DNA probes | DNA probes | Cytogenetics |
| Species                       |                            |            |            |              |
| <i>An. amharicus</i>          |                            |            |            |              |
| <i>An. arabiensis</i>         |                            | 1          | 1          | 1            |
| <i>An. bwambae</i>            | 1                          |            |            | 1            |
| <i>An. coluzzii</i>           |                            |            |            |              |
| <i>An. gambiae s.s.</i>       |                            |            |            |              |
| <i>An. coluzzii/gambiae</i>   |                            | 1          | 1          | 1            |
| <i>An. melas</i>              | 1                          | 1          | 1          | 1            |
| <i>An. merus</i>              | 1                          | 1          | 1          | 1            |
| <i>An. quadriannulatus</i>    | 1                          |            | 1          | 1            |
| <i>An. nili</i>               |                            |            |            |              |
| <i>An. carnevalei</i>         |                            |            |            |              |
| <i>An. ovengensis</i>         |                            |            |            |              |
| <i>An. somalicus</i>          |                            |            |            |              |
| <i>An. aruni</i>              |                            |            |            |              |
| <i>An. confusus</i>           |                            |            |            |              |
| <i>An. funestus</i>           |                            |            |            |              |
| <i>An. funestus-like</i>      |                            |            |            |              |
| <i>An. longipalpis type C</i> |                            |            |            |              |
| <i>An. parensis</i>           |                            |            |            |              |
| <i>An. vaneedeni</i>          |                            |            |            |              |
| <i>An. brucei</i>             |                            |            |            |              |
| <i>An. fuscivenosus</i>       |                            |            |            |              |
| <i>An. rivulorum</i>          |                            |            |            |              |
| <i>An. rivulorum-like</i>     |                            |            |            |              |
| <i>An. leesoni</i>            |                            |            |            |              |
| <i>An. moucheti</i>           |                            |            |            |              |
| <i>An. bervoetsi</i>          |                            |            |            |              |

| First Author                  | Carlson            | Gatti                | Frizzi                        |
|-------------------------------|--------------------|----------------------|-------------------------------|
| Year of publication           | 1980               | 1977                 | 1956                          |
| Technique                     | Gas chromatography | Fluorescence banding | Cytogenetics: salivary glands |
| Species                       |                    |                      |                               |
| <i>An. amharicus</i>          |                    |                      |                               |
| <i>An. arabiensis</i>         | 1                  | 1                    |                               |
| <i>An. bwambae</i>            |                    |                      |                               |
| <i>An. coluzzii</i>           |                    |                      |                               |
| <i>An. gambiae s.s.</i>       |                    |                      |                               |
| <i>An. coluzzii/gambiae</i>   | 1                  | 1                    | 1                             |
| <i>An. melas</i>              |                    |                      |                               |
| <i>An. merus</i>              |                    |                      |                               |
| <i>An. quadriannulatus</i>    |                    |                      |                               |
| <i>An. nili</i>               |                    |                      |                               |
| <i>An. carnevalei</i>         |                    |                      |                               |
| <i>An. ovengensis</i>         |                    |                      |                               |
| <i>An. somalicus</i>          |                    |                      |                               |
| <i>An. aruni</i>              |                    |                      |                               |
| <i>An. confusus</i>           |                    |                      |                               |
| <i>An. funestus</i>           |                    |                      |                               |
| <i>An. funestus-like</i>      |                    |                      |                               |
| <i>An. longipalpis type C</i> |                    |                      |                               |
| <i>An. parensis</i>           |                    |                      |                               |
| <i>An. vaneedeni</i>          |                    |                      |                               |
| <i>An. brucei</i>             |                    |                      |                               |
| <i>An. fuscivenosus</i>       |                    |                      |                               |
| <i>An. rivulorum</i>          |                    |                      |                               |
| <i>An. rivulorum-like</i>     |                    |                      |                               |
| <i>An. lesoni</i>             |                    |                      |                               |
| <i>An. moucheti</i>           |                    |                      |                               |
| <i>An. bervoetsi</i>          |                    |                      |                               |

| First Author                  | Fontenille    | Paskewitz | Taylor     | Wilkerson | Davidson     |
|-------------------------------|---------------|-----------|------------|-----------|--------------|
| Year of publication           | 1993          | 1993      | 1993       | 1993      | 1973         |
| Technique                     | PCR: rDNA IGS | PCR       | RFLP & PCR | PCR-RAPD: | Cytogenetics |
| Species                       |               |           |            |           |              |
| <i>An. amharicus</i>          |               |           |            |           |              |
| <i>An. arabiensis</i>         | 1             | 1         | 1          | 1         |              |
| <i>An. bwambae</i>            |               |           |            |           | 1            |
| <i>An. coluzzii</i>           |               |           |            |           |              |
| <i>An. gambiae s.s.</i>       |               |           |            |           |              |
| <i>An. coluzzii/gambiae</i>   | 1             |           | 1          | 1         |              |
| <i>An. melas</i>              |               |           |            |           |              |
| <i>An. merus</i>              |               | 1         | 1          |           |              |
| <i>An. quadriannulatus</i>    |               | 1         |            |           |              |
| <i>An. nili</i>               |               |           |            |           |              |
| <i>An. carnevalei</i>         |               |           |            |           |              |
| <i>An. ovengensis</i>         |               |           |            |           |              |
| <i>An. somalicus</i>          |               |           |            |           |              |
| <i>An. aruni</i>              |               |           |            |           |              |
| <i>An. confusus</i>           |               |           |            |           |              |
| <i>An. funestus</i>           |               |           |            |           |              |
| <i>An. funestus-like</i>      |               |           |            |           |              |
| <i>An. longipalpis type C</i> |               |           |            |           |              |
| <i>An. parensis</i>           |               |           |            |           |              |
| <i>An. vaneedeni</i>          |               |           |            |           |              |
| <i>An. brucei</i>             |               |           |            |           |              |
| <i>An. fuscivenosus</i>       |               |           |            |           |              |
| <i>An. rivulorum</i>          |               |           |            |           |              |
| <i>An. rivulorum-like</i>     |               |           |            |           |              |
| <i>An. lesoni</i>             |               |           |            |           |              |
| <i>An. moucheti</i>           |               |           |            |           |              |
| <i>An. bervoetsi</i>          |               |           |            |           |              |

| First Author                  | Coluzzi                           | Cornel        | Hill       | Collins    |
|-------------------------------|-----------------------------------|---------------|------------|------------|
| Year of publication           | 1968                              | 1997          | 1991       | 1988       |
| Technique                     | Cytogenetics: ovarian nurse cells | PCR: rDNA IGS | DNA probes | DNA probes |
| Species                       |                                   |               |            |            |
| <i>An. amharicus</i>          |                                   |               |            |            |
| <i>An. arabiensis</i>         | 1                                 | 1             | 1          | 1          |
| <i>An. bwambae</i>            |                                   |               |            |            |
| <i>An. coluzzii</i>           |                                   |               |            |            |
| <i>An. gambiae s.s.</i>       |                                   |               |            |            |
| <i>An. coluzzii/gambiae</i>   | 1                                 | 1             | 1          | 1          |
| <i>An. melas</i>              |                                   | 1             | 1          | 1          |
| <i>An. merus</i>              |                                   | 1             | 1          | 1          |
| <i>An. quadriannulatus</i>    |                                   | 1             |            | 1          |
| <i>An. nili</i>               |                                   |               |            |            |
| <i>An. carnevalei</i>         |                                   |               |            |            |
| <i>An. ovengensis</i>         |                                   |               |            |            |
| <i>An. somalicus</i>          |                                   |               |            |            |
| <i>An. aruni</i>              |                                   |               |            |            |
| <i>An. confusus</i>           |                                   |               |            |            |
| <i>An. funestus</i>           |                                   |               |            |            |
| <i>An. funestus-like</i>      |                                   |               |            |            |
| <i>An. longipalpis type C</i> |                                   |               |            |            |
| <i>An. parensis</i>           |                                   |               |            |            |
| <i>An. vaneedeni</i>          |                                   |               |            |            |
| <i>An. brucei</i>             |                                   |               |            |            |
| <i>An. fuscivenosus</i>       |                                   |               |            |            |
| <i>An. rivulorum</i>          |                                   |               |            |            |
| <i>An. rivulorum-like</i>     |                                   |               |            |            |
| <i>An. leesoni</i>            |                                   |               |            |            |
| <i>An. moucheti</i>           |                                   |               |            |            |
| <i>An. bervoetsi</i>          |                                   |               |            |            |

| First Author                  | Besansky      | Hamilton     | Kengne         | Kengne         |  |
|-------------------------------|---------------|--------------|----------------|----------------|--|
| Year of publication           | 2006          | 1983         | 2007           | 2003           |  |
| Technique                     | PCR: rDNA IGS | CHC analysis | PCR: rDNA ITS1 | PCR: rDNA ITS2 |  |
| Species                       |               |              |                |                |  |
| <i>An. amharicus</i>          |               |              |                |                |  |
| <i>An. arabiensis</i>         | 1             | 1            |                |                |  |
| <i>An. bwambae</i>            | 1             |              |                |                |  |
| <i>An. coluzzii</i>           |               |              |                |                |  |
| <i>An. gambiae s.s.</i>       |               |              |                |                |  |
| <i>An. coluzzii/gambiae</i>   | 1             | 1            |                |                |  |
| <i>An. melas</i>              | 1             | 1            |                |                |  |
| <i>An. merus</i>              | 1             |              |                |                |  |
| <i>An. quadriannulatus</i>    |               |              |                |                |  |
| <i>An. nili</i>               |               |              |                | 1              |  |
| <i>An. carnevalei</i>         |               |              |                | 1              |  |
| <i>An. ovengensis</i>         |               |              |                | 1              |  |
| <i>An. somalicus</i>          |               |              |                | 1              |  |
| <i>An. aruni</i>              |               |              |                |                |  |
| <i>An. confusus</i>           |               |              |                |                |  |
| <i>An. funestus</i>           |               |              |                |                |  |
| <i>An. funestus-like</i>      |               |              |                |                |  |
| <i>An. longipalpis type C</i> |               |              |                |                |  |
| <i>An. parensis</i>           |               |              |                |                |  |
| <i>An. vaneedeni</i>          |               |              |                |                |  |
| <i>An. brucei</i>             |               |              |                |                |  |
| <i>An. fuscivenosus</i>       |               |              |                |                |  |
| <i>An. rivulorum</i>          |               |              |                |                |  |
| <i>An. rivulorum-like</i>     |               |              |                |                |  |
| <i>An. leesoni</i>            |               |              |                |                |  |
| <i>An. moucheti</i>           |               |              |                | 1              |  |
| <i>An. bervoetsi</i>          |               |              |                | 1              |  |

| First Author                  | Koekemoer      | Garros         | Cohuet         | Spillings      |
|-------------------------------|----------------|----------------|----------------|----------------|
| Year of publication           | 2002           | 2004           | 2003           | 2009           |
| Technique                     | PCR: rDNA ITS2 | PCR: rDNA ITS2 | PCR: rDNA ITS2 | PCR: rDNA ITS2 |
| Species                       |                |                |                |                |
| <i>An. amharicus</i>          |                |                |                |                |
| <i>An. arabiensis</i>         |                |                |                |                |
| <i>An. bwambae</i>            |                |                |                |                |
| <i>An. coluzzii</i>           |                |                |                |                |
| <i>An. gambiae s.s.</i>       |                |                |                |                |
| <i>An. coluzzii/gambiae</i>   |                |                |                |                |
| <i>An. melas</i>              |                |                |                |                |
| <i>An. merus</i>              |                |                |                |                |
| <i>An. quadriannulatus</i>    |                |                |                |                |
| <i>An. nili</i>               |                |                |                |                |
| <i>An. carnevalei</i>         |                |                |                |                |
| <i>An. ovengensis</i>         |                |                |                |                |
| <i>An. somalicus</i>          |                |                |                |                |
| <i>An. aruni</i>              |                |                |                |                |
| <i>An. confusus</i>           |                |                |                |                |
| <i>An. funestus</i>           | 1              | 1              | 1              | 1              |
| <i>An. funestus-like</i>      |                |                |                | 1              |
| <i>An. longipalpis type C</i> |                |                |                |                |
| <i>An. parensis</i>           | 1              | 1              | 1              | 1              |
| <i>An. vaneedeni</i>          | 1              | 1              | 1              | 1              |
| <i>An. brucei</i>             |                |                |                |                |
| <i>An. fuscivenosus</i>       |                |                |                |                |
| <i>An. rivulorum</i>          | 1              | 1              | 1              | 1              |
| <i>An. rivulorum-like</i>     |                |                | 1              |                |
| <i>An. leesoni</i>            | 1              | 1              | 1              | 1              |
| <i>An. moucheti</i>           |                |                |                |                |
| <i>An. bervoetsi</i>          |                |                |                |                |

| First Author                  | Garros                           | Green                             |
|-------------------------------|----------------------------------|-----------------------------------|
| Year of publication           | 2005                             | 1979                              |
| Technique                     | Sequencing: rDNA D3 & mtDNA COII | Cytogenetics: ovarian nurse cells |
| Species                       |                                  |                                   |
| <i>An. amharicus</i>          |                                  |                                   |
| <i>An. arabiensis</i>         |                                  |                                   |
| <i>An. bwambae</i>            |                                  |                                   |
| <i>An. coluzzii</i>           |                                  |                                   |
| <i>An. gambiae s.s.</i>       |                                  |                                   |
| <i>An. coluzzii/gambiae</i>   |                                  |                                   |
| <i>An. melas</i>              |                                  |                                   |
| <i>An. merus</i>              |                                  |                                   |
| <i>An. quadriannulatus</i>    |                                  |                                   |
| <i>An. nili</i>               |                                  |                                   |
| <i>An. carnevalei</i>         |                                  |                                   |
| <i>An. ovengensis</i>         |                                  |                                   |
| <i>An. somalicus</i>          |                                  |                                   |
| <i>An. aruni</i>              |                                  |                                   |
| <i>An. confusus</i>           |                                  |                                   |
| <i>An. funestus</i>           | 1                                | 1                                 |
| <i>An. funestus-like</i>      |                                  |                                   |
| <i>An. longipalpis type C</i> |                                  |                                   |
| <i>An. parensis</i>           | 1                                | 1                                 |
| <i>An. vaneedeni</i>          | 1                                |                                   |
| <i>An. brucei</i>             |                                  |                                   |
| <i>An. fuscivenosus</i>       |                                  |                                   |
| <i>An. rivulorum</i>          | 1                                |                                   |
| <i>An. rivulorum-like</i>     | 1                                |                                   |
| <i>An. leesoni</i>            | 1                                |                                   |
| <i>An. moucheti</i>           |                                  |                                   |
| <i>An. bervoetsi</i>          |                                  |                                   |

| First Author                  | Choi                | Garros              |  |
|-------------------------------|---------------------|---------------------|--|
| Year of publication           | 2010                | 2004                |  |
| Technique                     | PCR-RFLP: rDNA ITS2 | PCR-RFLP: ITS2 & D3 |  |
| Species                       |                     |                     |  |
| <i>An. amharicus</i>          |                     |                     |  |
| <i>An. arabiensis</i>         |                     |                     |  |
| <i>An. bwambae</i>            |                     |                     |  |
| <i>An. coluzzii</i>           |                     |                     |  |
| <i>An. gambiae s.s.</i>       |                     |                     |  |
| <i>An. coluzzii/gambiae</i>   |                     |                     |  |
| <i>An. melas</i>              |                     |                     |  |
| <i>An. merus</i>              |                     |                     |  |
| <i>An. quadriannulatus</i>    |                     |                     |  |
| <i>An. nili</i>               |                     |                     |  |
| <i>An. carnevalei</i>         |                     |                     |  |
| <i>An. ovengensis</i>         |                     |                     |  |
| <i>An. somalicus</i>          |                     |                     |  |
| <i>An. aruni</i>              |                     |                     |  |
| <i>An. confusus</i>           |                     |                     |  |
| <i>An. funestus</i>           | 1                   | 1                   |  |
| <i>An. funestus-like</i>      | 1                   |                     |  |
| <i>An. longipalpis type C</i> | 1                   |                     |  |
| <i>An. parensis</i>           |                     | 1                   |  |
| <i>An. vaneedeni</i>          | 1                   | 1                   |  |
| <i>An. brucei</i>             |                     |                     |  |
| <i>An. fuscivenosus</i>       |                     |                     |  |
| <i>An. rivulorum</i>          | 1                   | 1                   |  |
| <i>An. rivulorum-like</i>     |                     |                     |  |
| <i>An. leesoni</i>            | 1                   | 1                   |  |
| <i>An. moucheti</i>           |                     |                     |  |
| <i>An. bervoetsi</i>          |                     |                     |  |

| First Author                  | Green                                         | Koekemoer         | Koekemoer |
|-------------------------------|-----------------------------------------------|-------------------|-----------|
| Year of publication           | 1982                                          | 1998              | 1999      |
| Technique                     | Cytogenetics: salivary glands and nurse cells | PCR-RFLP: rDNA D3 | PCR-SSCP  |
| Species                       |                                               |                   |           |
| <i>An. amharicus</i>          |                                               |                   |           |
| <i>An. arabiensis</i>         |                                               |                   |           |
| <i>An. bwambae</i>            |                                               |                   |           |
| <i>An. coluzzii</i>           |                                               |                   |           |
| <i>An. gambiae s.s.</i>       |                                               |                   |           |
| <i>An. coluzzii/gambiae</i>   |                                               |                   |           |
| <i>An. melas</i>              |                                               |                   |           |
| <i>An. merus</i>              |                                               |                   |           |
| <i>An. quadriannulatus</i>    |                                               |                   |           |
| <i>An. nili</i>               |                                               |                   |           |
| <i>An. carnevalei</i>         |                                               |                   |           |
| <i>An. ovengensis</i>         |                                               |                   |           |
| <i>An. somalicus</i>          |                                               |                   |           |
| <i>An. aruni</i>              |                                               |                   |           |
| <i>An. confusus</i>           | 1                                             |                   |           |
| <i>An. funestus</i>           | 1                                             | 1                 | 1         |
| <i>An. funestus-like</i>      |                                               |                   |           |
| <i>An. longipalpis type C</i> |                                               |                   |           |
| <i>An. parensis</i>           | 1                                             |                   |           |
| <i>An. vaneedeni</i>          | 1                                             | 1                 |           |
| <i>An. brucei</i>             |                                               |                   |           |
| <i>An. fuscivenosus</i>       | 1                                             |                   |           |
| <i>An. rivulorum</i>          | 1                                             |                   | 1         |
| <i>An. rivulorum-like</i>     |                                               |                   |           |
| <i>An. leesoni</i>            | 1                                             |                   | 1         |
| <i>An. moucheti</i>           |                                               |                   |           |
| <i>An. bervoetsi</i>          |                                               |                   |           |

| First Author                  | Hackett        | Koekemoer      | Chen                |
|-------------------------------|----------------|----------------|---------------------|
| Year of publication           | 2000           | 2009           | 2003                |
| Technique                     | PCR: rDNA ITS2 | PCR: rDNA ITS2 | Sequencing: rDNA D3 |
| Species                       |                |                |                     |
| <i>An. amharicus</i>          |                |                |                     |
| <i>An. arabiensis</i>         |                |                |                     |
| <i>An. bwambae</i>            |                |                |                     |
| <i>An. coluzzii</i>           |                |                |                     |
| <i>An. gambiae s.s.</i>       |                |                |                     |
| <i>An. coluzzii/gambiae</i>   |                |                |                     |
| <i>An. melas</i>              |                |                |                     |
| <i>An. merus</i>              |                |                |                     |
| <i>An. quadriannulatus</i>    |                |                |                     |
| <i>An. nili</i>               |                |                |                     |
| <i>An. carnevalei</i>         |                |                |                     |
| <i>An. ovengensis</i>         |                |                |                     |
| <i>An. somalicus</i>          |                |                |                     |
| <i>An. aruni</i>              |                |                |                     |
| <i>An. confusus</i>           |                |                |                     |
| <i>An. funestus</i>           | 1              | 1              | 1                   |
| <i>An. funestus-like</i>      |                |                |                     |
| <i>An. longipalpis type C</i> |                | 1              |                     |
| <i>An. parensis</i>           |                | 1              |                     |
| <i>An. vaneedeni</i>          |                | 1              |                     |
| <i>An. brucei</i>             |                |                |                     |
| <i>An. fuscivenosus</i>       |                |                |                     |
| <i>An. rivulorum</i>          | 1              | 1              |                     |
| <i>An. rivulorum-like</i>     |                |                |                     |
| <i>An. leesoni</i>            |                | 1              | 1                   |
| <i>An. moucheti</i>           |                |                |                     |
| <i>An. bervoetsi</i>          |                |                |                     |

| First Author                  | Garros                                | Vezenegho  |  |
|-------------------------------|---------------------------------------|------------|--|
| Year of publication           | 2005                                  | 2009       |  |
| Technique                     | Sequencing: rDNA ITS2, D3 & mtDNA COI | PCR-TaqMan |  |
| Species                       |                                       |            |  |
| <i>An. amharicus</i>          |                                       |            |  |
| <i>An. arabiensis</i>         |                                       |            |  |
| <i>An. bwambae</i>            |                                       |            |  |
| <i>An. coluzzii</i>           |                                       |            |  |
| <i>An. gambiae s.s.</i>       |                                       |            |  |
| <i>An. coluzzii/gambiae</i>   |                                       |            |  |
| <i>An. melas</i>              |                                       |            |  |
| <i>An. merus</i>              |                                       |            |  |
| <i>An. quadriannulatus</i>    |                                       |            |  |
| <i>An. nili</i>               |                                       |            |  |
| <i>An. carnevalei</i>         |                                       |            |  |
| <i>An. ovengensis</i>         |                                       |            |  |
| <i>An. somalicus</i>          |                                       |            |  |
| <i>An. aruni</i>              |                                       |            |  |
| <i>An. confusus</i>           |                                       |            |  |
| <i>An. funestus</i>           | 1                                     | 1          |  |
| <i>An. funestus-like</i>      |                                       |            |  |
| <i>An. longipalpis type C</i> |                                       |            |  |
| <i>An. parensis</i>           | 1                                     | 1          |  |
| <i>An. vaneedeni</i>          | 1                                     | 1          |  |
| <i>An. brucei</i>             |                                       |            |  |
| <i>An. fuscivenosus</i>       |                                       |            |  |
| <i>An. rivulorum</i>          | 1                                     | 1          |  |
| <i>An. rivulorum-like</i>     |                                       |            |  |
| <i>An. lesoni</i>             | 1                                     | 1          |  |
| <i>An. moucheti</i>           |                                       |            |  |
| <i>An. bervoetsi</i>          |                                       |            |  |

| First Author                  | Weeto                     | Singh                     |
|-------------------------------|---------------------------|---------------------------|
| Year of publication           | 2004                      | 2010                      |
| Technique                     | PCR-SSCP & PCR: rDNA ITS2 | Sequencing: rDNA ITS & D3 |
| Species                       |                           |                           |
| <i>An. amharicus</i>          |                           |                           |
| <i>An. arabiensis</i>         |                           |                           |
| <i>An. bwambae</i>            |                           |                           |
| <i>An. coluzzii</i>           |                           |                           |
| <i>An. gambiae s.s.</i>       |                           |                           |
| <i>An. coluzzii/gambiae</i>   |                           |                           |
| <i>An. melas</i>              |                           |                           |
| <i>An. merus</i>              |                           |                           |
| <i>An. quadriannulatus</i>    |                           |                           |
| <i>An. nili</i>               |                           |                           |
| <i>An. carnevalei</i>         |                           |                           |
| <i>An. ovengensis</i>         |                           |                           |
| <i>An. somalicus</i>          |                           |                           |
| <i>An. aruni</i>              |                           |                           |
| <i>An. confusus</i>           |                           |                           |
| <i>An. funestus</i>           | 1                         |                           |
| <i>An. funestus-like</i>      |                           |                           |
| <i>An. longipalpis type C</i> |                           |                           |
| <i>An. parensis</i>           | 1                         |                           |
| <i>An. vaneedeni</i>          | 1                         |                           |
| <i>An. brucei</i>             |                           |                           |
| <i>An. fuscivenosus</i>       |                           |                           |
| <i>An. rivulorum</i>          | 1                         |                           |
| <i>An. rivulorum-like</i>     |                           |                           |
| <i>An. leesoni</i>            | 1                         |                           |
| <i>An. moucheti</i>           |                           |                           |
| <i>An. bervoetsi</i>          |                           |                           |

|                               |                           |
|-------------------------------|---------------------------|
| <b>First Author</b>           | <b>Koekemoer</b>          |
| <b>Year of publication</b>    | <b>2002</b>               |
| <b>Technique</b>              | PCR-SSCP & PCR: rDNA ITS2 |
| <b>Species</b>                |                           |
| <i>An. amharicus</i>          |                           |
| <i>An. arabiensis</i>         |                           |
| <i>An. bwambae</i>            |                           |
| <i>An. coluzzii</i>           |                           |
| <i>An. gambiae s.s.</i>       |                           |
| <i>An. coluzzii/gambiae</i>   |                           |
| <i>An. melas</i>              |                           |
| <i>An. merus</i>              |                           |
| <i>An. quadriannulatus</i>    |                           |
| <i>An. nili</i>               |                           |
| <i>An. carnevalei</i>         |                           |
| <i>An. ovengensis</i>         |                           |
| <i>An. somalicus</i>          |                           |
| <i>An. aruni</i>              |                           |
| <i>An. confusus</i>           |                           |
| <i>An. funestus</i>           | 1                         |
| <i>An. funestus-like</i>      |                           |
| <i>An. longipalpis type C</i> |                           |
| <i>An. parensis</i>           | 1                         |
| <i>An. vaneedeni</i>          | 1                         |
| <i>An. brucei</i>             |                           |
| <i>An. fuscivenosus</i>       |                           |
| <i>An. rivulorum</i>          | 1                         |
| <i>An. rivulorum-like</i>     |                           |
| <i>An. lesoni</i>             | 1                         |
| <i>An. moucheti</i>           |                           |
| <i>An. bervoetsi</i>          |                           |
